# Supplementary material for: Co-assembled supramolecular hydrogels: nano-IR sheds light on tripeptide assemblies
Source: Royal Society of Chemistry journal article supplement (doi:10.1039/d4fd00193a), 2025-01-01
Supplement: d4fd00193a1.pdf [file d4fd00193a1.pdf]

## Supporting information

# Co-assembled supramolecular hydrogels: Nano-IR sheds light on tripeptide assemblies

Paola Alletto,<sup>a</sup> Ana M. Garcia,<sup>b</sup> Federica Piccirilli\*<sup>c</sup> and Silvia Marchesan\*<sup>a</sup>

---

<sup>a</sup> Department of Chemical and Pharmaceutical Sciences, University of Trieste, Via. Giorgieri 1, 34127 Trieste, Italy. E-mail: [smarchesan@units.it](mailto:smarchesan@units.it).

<sup>b</sup> Facultad de Ciencias y Tecnologías Químicas, Instituto Regional de Investigación Científica Aplicada (IRICA), Universidad de Castilla-La Mancha, Ciudad Real 13071, Spain.

<sup>c</sup> Area Science Park, Padriciano 99, Trieste. Email: [federica.piccirilli@areasciencepark.it](mailto:federica.piccirilli@areasciencepark.it)

### Table of Contents

|                                                                                |    |
|--------------------------------------------------------------------------------|----|
| <i>S1. Spectroscopic data for D-His-L-Phe-L-Phe-NH<sub>2</sub> (hFF)</i> ..... | 2  |
| <i>S2. Spectroscopic data for L-His-D-Phe-D-Phe-NH<sub>2</sub> (Hff)</i> ..... | 2  |
| <i>S3. Spectroscopic data for L-Asp-D-Phe-D-Phe-NH<sub>2</sub> (Dff)</i> ..... | 2  |
| <i>S4. Oscillatory rheology</i> .....                                          | 5  |
| <i>S5. Thermoreversibility tests</i> .....                                     | 6  |
| <i>S6. Atomic Force Microscopy (AFM) and Nano-IR</i> .....                     | 8  |
| <i>S7. <sup>1</sup>H-NMR spectra of multicomponent samples</i> .....           | 10 |
| <i>S8. Catalytic Data</i> .....                                                | 12 |

### S1. Spectroscopic data for D-His-L-Phe-L-Phe-NH<sub>2</sub> (hFF)

The spectroscopic data for this tripeptide corresponded to the literature, as published in M. Kurbasic, Ana M. Garcia, S. Viada, and S. Marchesan, *Molecules* **2020**, *26*, 173: <sup>1</sup>H NMR (400 MHz, DMSO-*d*<sub>6</sub>) δ (ppm) 8.89 (s, 1H, NH), 8.68 (d, *J* = 8.7 Hz, 1H, NH), 8.47 (d, *J* = 8.2 Hz, 1H, NH), 8.15 (s, 3H, NH<sub>3</sub><sup>+</sup>), 7.44 (s, 1H, Ar), 7.32 – 7.03 (m, 10H, Ar), 6.89 (s, 1H, Ar), 4.76 – 4.64 (m, 1H, αCH), 4.46 (td, *J* = 8.7, 5.1 Hz, 1H, αCH), 4.15 – 4.01 (m, 1H, αCH), 3.06 (dd, *J* = 3.9 Hz, *J*<sub>gem</sub> = 13.8 Hz, 1H, βCH<sub>2</sub>), 3.01 (dd, *J* = 5.1 Hz, *J*<sub>gem</sub> = 13.8 Hz, 1H, βCH<sub>2</sub>), 2.90 (dd, *J* = 4.7 Hz, *J*<sub>gem</sub> = 15.8 Hz, 1H, βCH<sub>2</sub>), 2.82 (dd, *J* = 9.2 Hz, *J*<sub>gem</sub> = 13.9 Hz, 1H, βCH<sub>2</sub>), 2.72-2.63 (m, 2H, βCH<sub>2</sub>). <sup>13</sup>C NMR (100 MHz, DMSO-*d*<sub>6</sub>) δ (ppm) 173.1, 170.9, 167.3 (3 x CO); 138.3, 137.7, 134.8, 129.7, 129.6, 128.6, 128.4, 126.8, 119.0, 117.3, 115.9 (Ar); 54.6, 54.1, 51.6 (3 x αC); 38.7, 38.2, 26.8 (3 x βC). ESI-MS *m/z* 449.2 (M+H)<sup>+</sup> C<sub>24</sub>H<sub>28</sub>N<sub>6</sub>O<sub>3</sub> requires 449.2.

### S2. Spectroscopic data for L-His-D-Phe-D-Phe-NH<sub>2</sub> (Hff)

The spectroscopic data for this tripeptide corresponded to the literature, as published in Mari C. Manas Torres, P. Alletto, S. Adorinni, A. V. Vargiu, L. Alvarez Cienfuegos, and S. Marchesan, *Org. Biomol. Chem.* **2025**, *doi: 10.1039/D4OB01987C*. <sup>1</sup>H NMR (400 MHz, DMSO-*d*<sub>6</sub>) δ (ppm) 8.79 (s, 1H, NH), 8.69 (d, *J* = 8.9 Hz, 1H), 8.48 (d, *J* = 8.4 Hz, 1H), 8.15 (s, 2H, NH<sub>2</sub>), 7.46-6.88 (m, 14H, Ar, CONH<sub>2</sub>), 4.70 (td, *J* = 10.1, 4.0 Hz, 1H, αCH), 4.47 (td, *J* = 8.9, 5.2 Hz, 1H, αCH), 4.07 (dd, *J* = 9.2, 3.5 Hz, 1H, αCH), 3.10 – 3.00 (m, 2H, βCH<sub>2</sub>), 2.92 – 2.80 (dd, *J* = 13.9, 9.2 Hz, 2H, βCH<sub>2</sub>), 2.72 – 2.63 (m, 2H, βCH<sub>2</sub>). <sup>13</sup>C NMR (100 MHz, DMSO-*d*<sub>6</sub>) δ (ppm) 173.1, 170.9, 167.3 (3 x CO); 138.3, 137.7, 134.8, 129.7, 129.6, 128.6, 128.4, 126.8, 119.0, 117.3, 115.9 (Ar); 54.6, 54.1, 51.6 (3 x αC); 38.7, 38.2, 26.8 (3 x βC). ESI-MS *m/z* 448.6 (M+H)<sup>+</sup> C<sub>24</sub>H<sub>28</sub>N<sub>6</sub>O<sub>3</sub> requires 449.2.

### S3. Spectroscopic data for L-Asp-D-Phe-D-Phe-NH<sub>2</sub> (Dff)

<sup>1</sup>H NMR (400 MHz, DMSO-*d*<sub>6</sub>) δ (ppm) 12.93 (s (br), 1H, COOH), 8.58 (d, *J* = 8.8 Hz, 1, NH), 8.40 (d, *J* = 4.4 Hz, 1, NH), 7.99 (s(br), 3, NH<sub>3</sub><sup>+</sup>), 7.45 (s, 1, NH<sub>2</sub>), 7.31-7.16 (m, 10, Ar), 7.10 (s, 1, NH<sub>2</sub>), 4.67 (ddd, *J* = 4 Hz, *J* = 8.8 Hz, 10.4 Hz, 1, CHα), 4.47 (ddd, *J* = 5.2 Hz, *J* = 8.4 Hz, *J* = 8.8 Hz, 1, CHα), 3.96 (b, 1, CHα), 3.07 (dd, *J* = 4 Hz, *J* = 14 Hz, 1H, CHβ), 3.02 (dd, *J* = 5.2 Hz, *J* = 14 Hz, 1, CHβ),

2.82 (dd,  $J = 8.8$  Hz,  $J = 14$  Hz, 1,  $\text{CH}_\beta$ ), 2.65 (dd,  $J = 10.4$  Hz,  $J = 14$  Hz, 1,  $\text{CH}_\beta$ ), 2.39 (dd,  $J = 3.6$  Hz,  $J = 17.6$  Hz, 1,  $\text{CH}_\beta$ ), 2.27 (dd,  $J = 9.2$  Hz,  $J = 18.1$  Hz,  $\text{CH}_\beta$ ).  $^{13}\text{C}$ -NMR (100 MHz,  $\text{DMSO-}d_6$ )  $\delta$  (ppm) 172.6, 170.9, 170.4, 167.13 (4 x CO); 137.8, 137.2, 129.2, 129.2, 128.1, 127.9, 126.4, 126.3 (Ar); 54.02, 53.5, 48.7 (3 x  $\alpha\text{C}$ ); 39.2, 37.7, 35.7 (3 x  $\beta\text{C}$ ). ESI-MS  $m/z$  424.6 ( $\text{M-H}^-$ )  $\text{C}_{22}\text{H}_{25}\text{N}_4\text{O}_5$  requires 425.2.

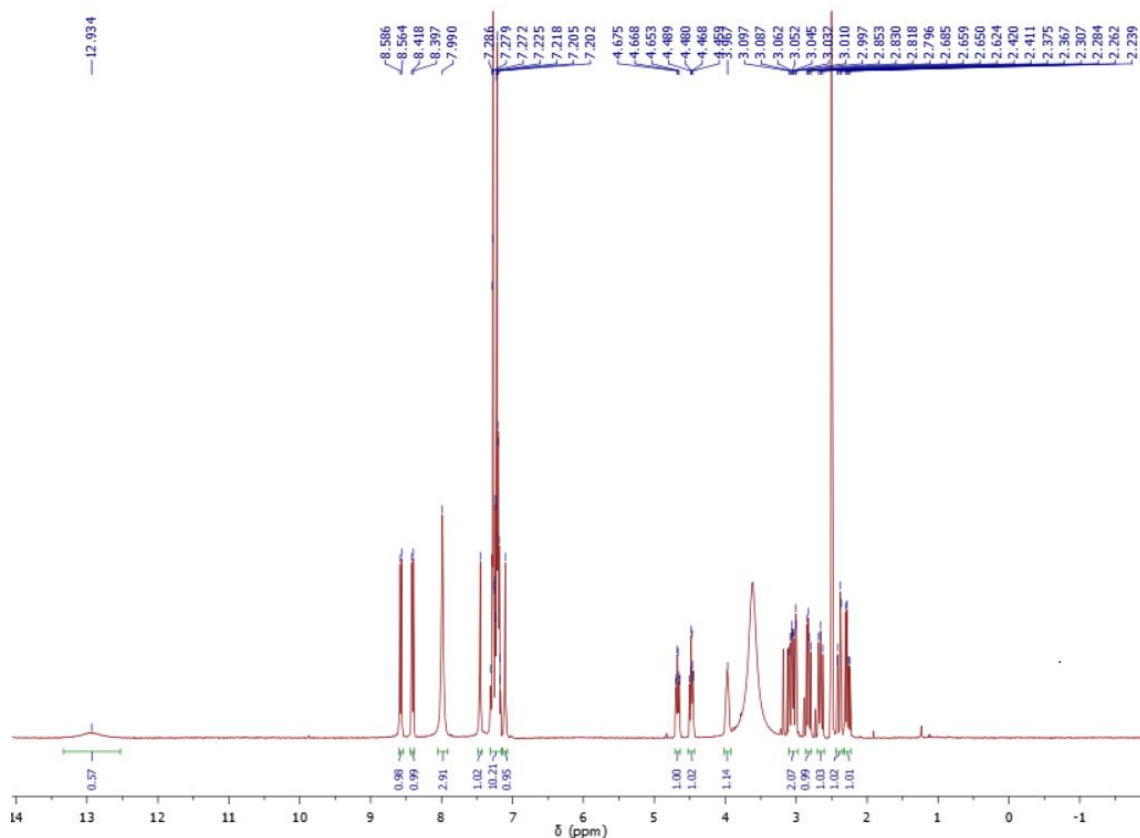

**Figure S1.**  $^1\text{H}$ -NMR spectrum of L-Asp-D-Phe-D-Phe-NH<sub>2</sub> (Dff).

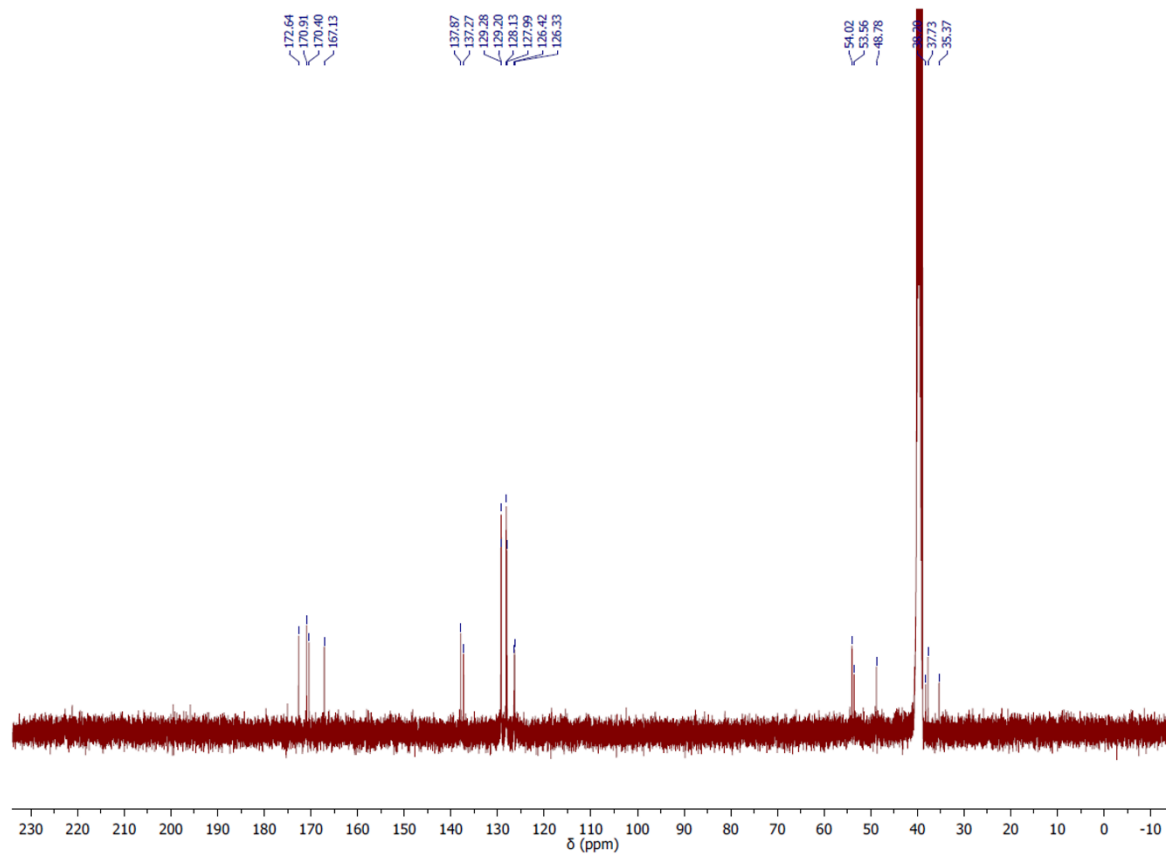

**Figure S2.**  $^{13}\text{C}$ -NMR spectrum of L-Asp-D-Phe-D-Phe-NH<sub>2</sub> (Dff).

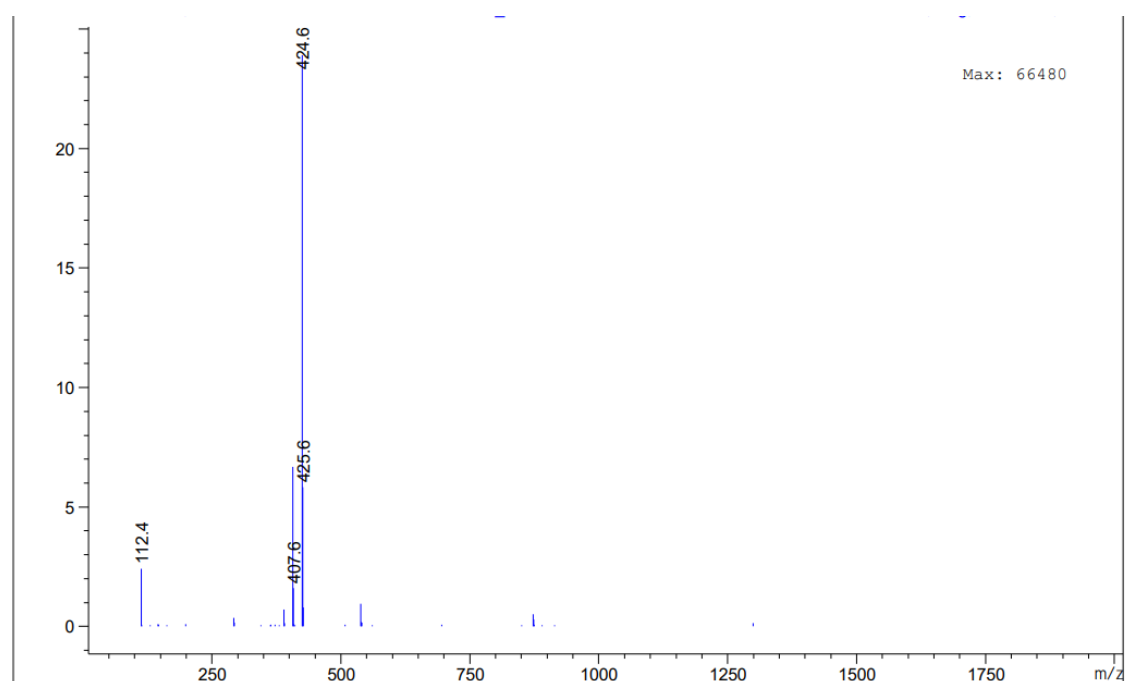

**Figure S3.** ESI-MS spectrum (negative ion mode) of L-Asp-D-Phe-D-Phe-NH<sub>2</sub> (Dff).

#### S4. Oscillatory rheology

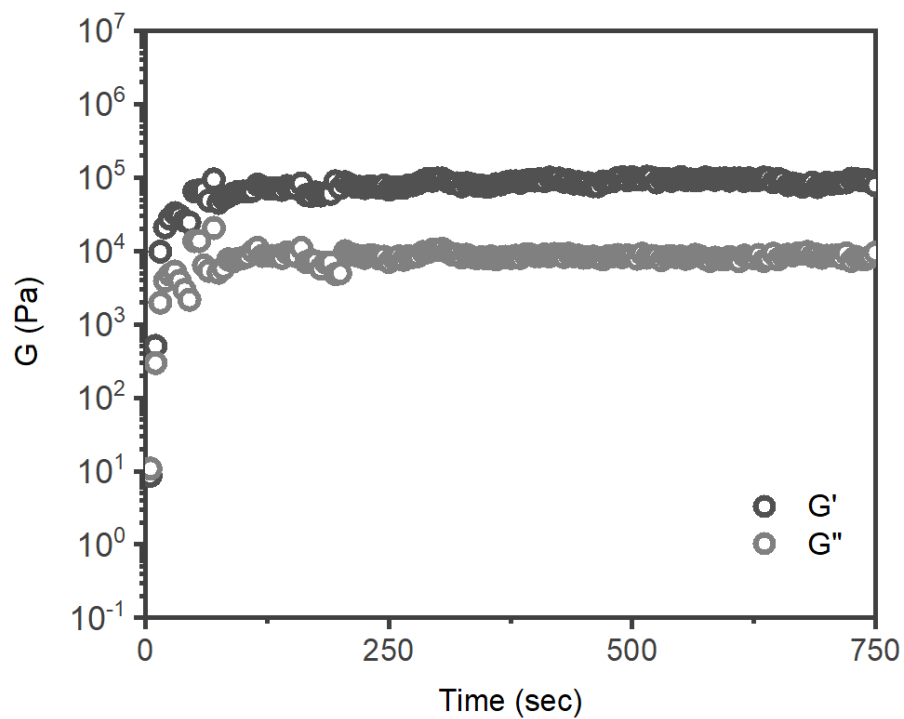

**Figure S4.** Time sweep of Dff hydrogel (25 mM).

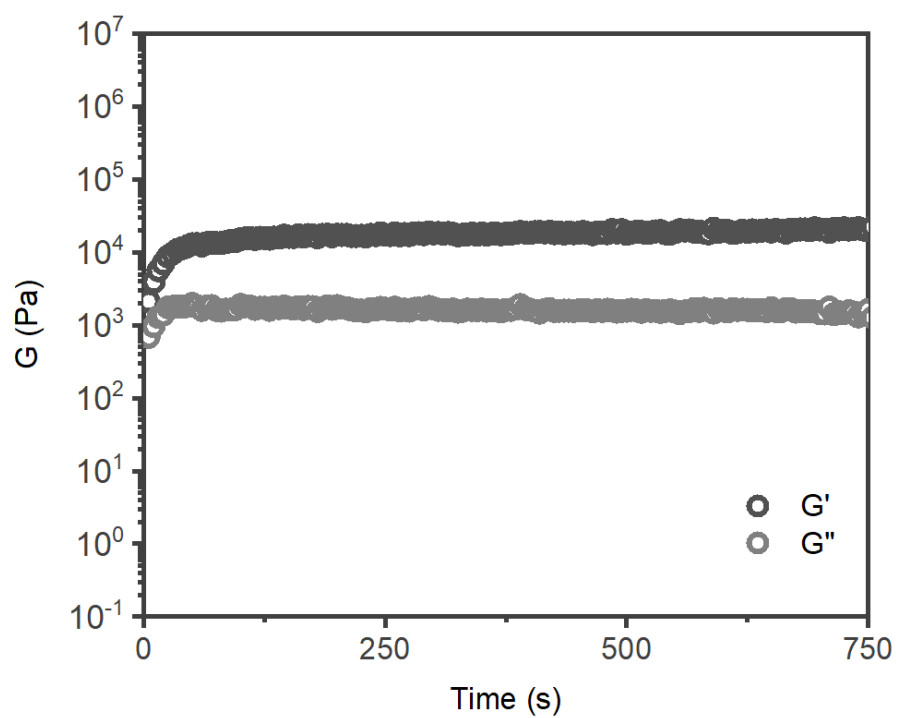

**Figure S5.** Time sweep of Hff/Dff co-assembled hydrogel (25 mM each).

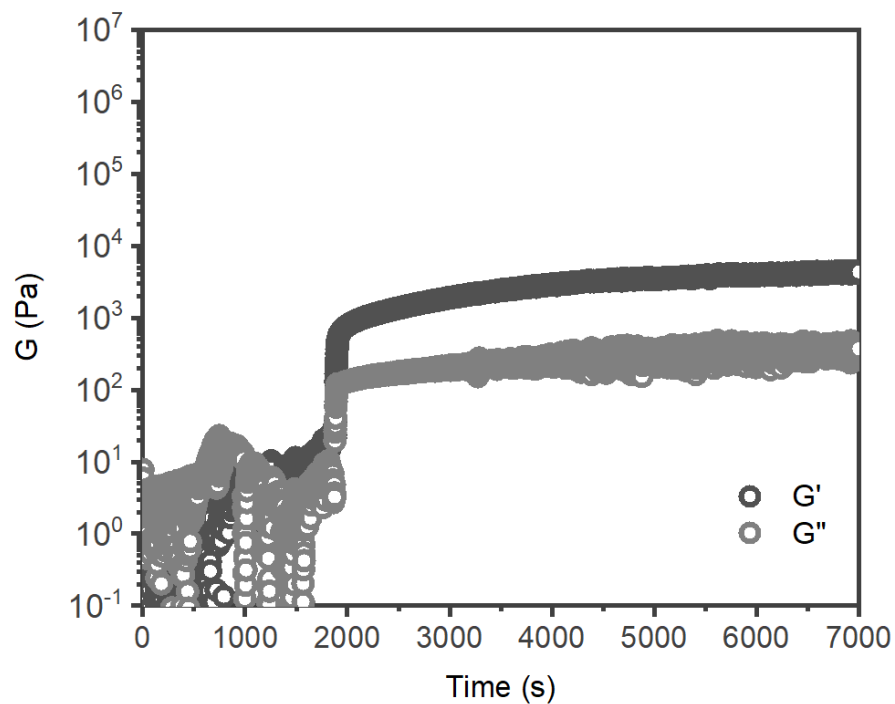

**Figure S6.** Time sweep of hFF/Dff co-assembled hydrogel (25 mM each).

### S5. Thermoreversibility tests

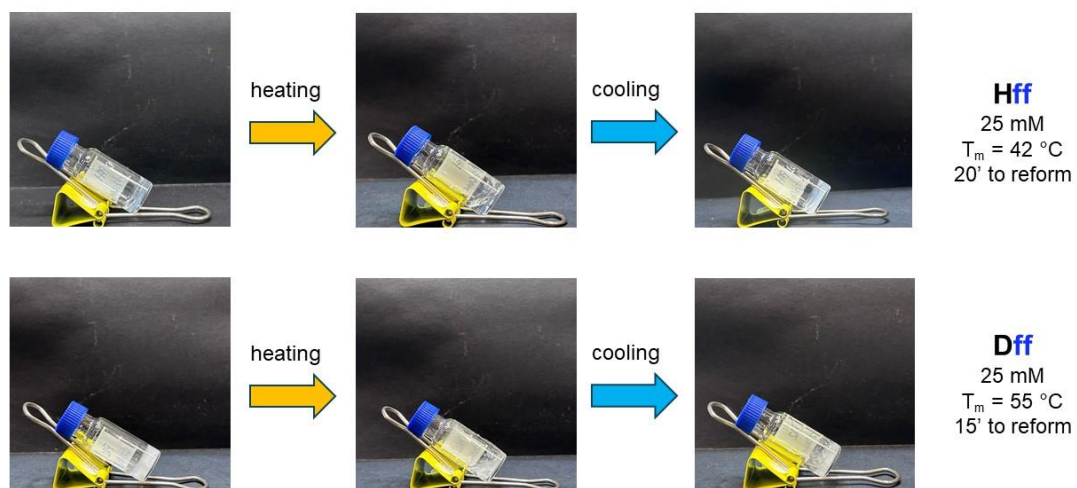

**Figure S7.** Thermoreversibility test for Hff and Dff hydrogels at 25 mM.

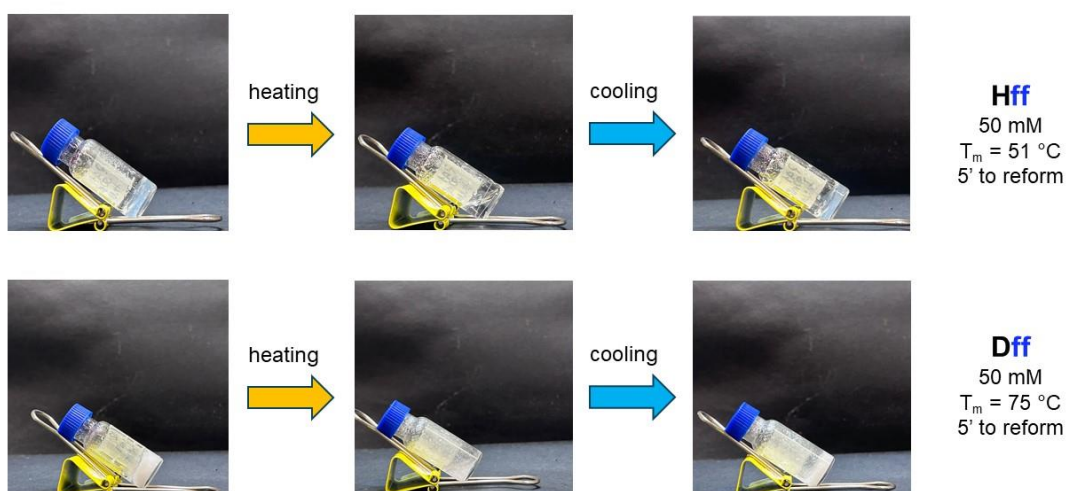

**Figure S8.** Thermoreversibility test for Hff and Dff hydrogels at 50 mM.

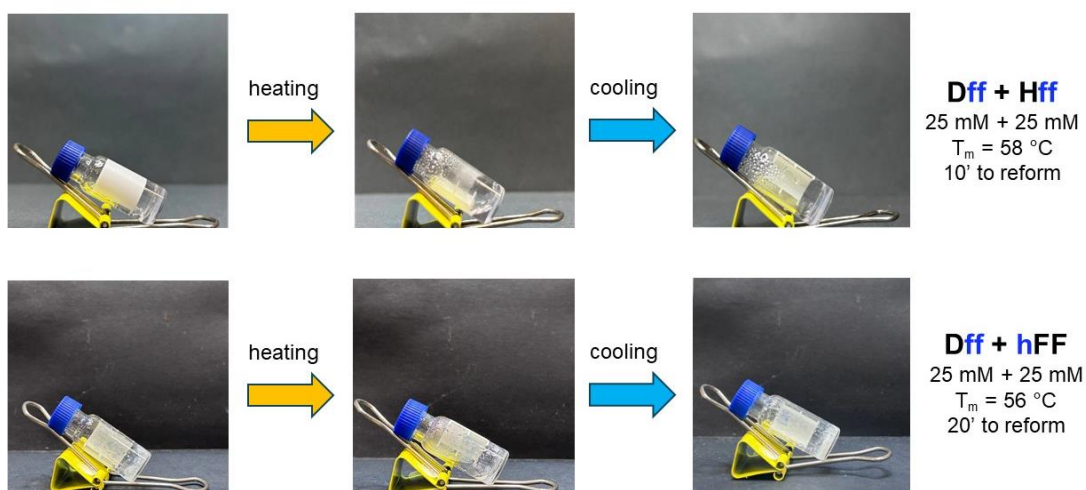

**Figure S9.** Thermoreversibility test for multicomponent hydrogels.

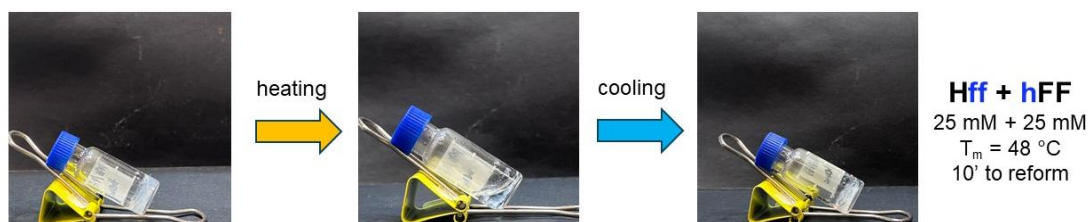

**Figure S10.** Thermoreversibility test for racemic hydrogel.

## S6. Atomic Force Microscope (AFM)

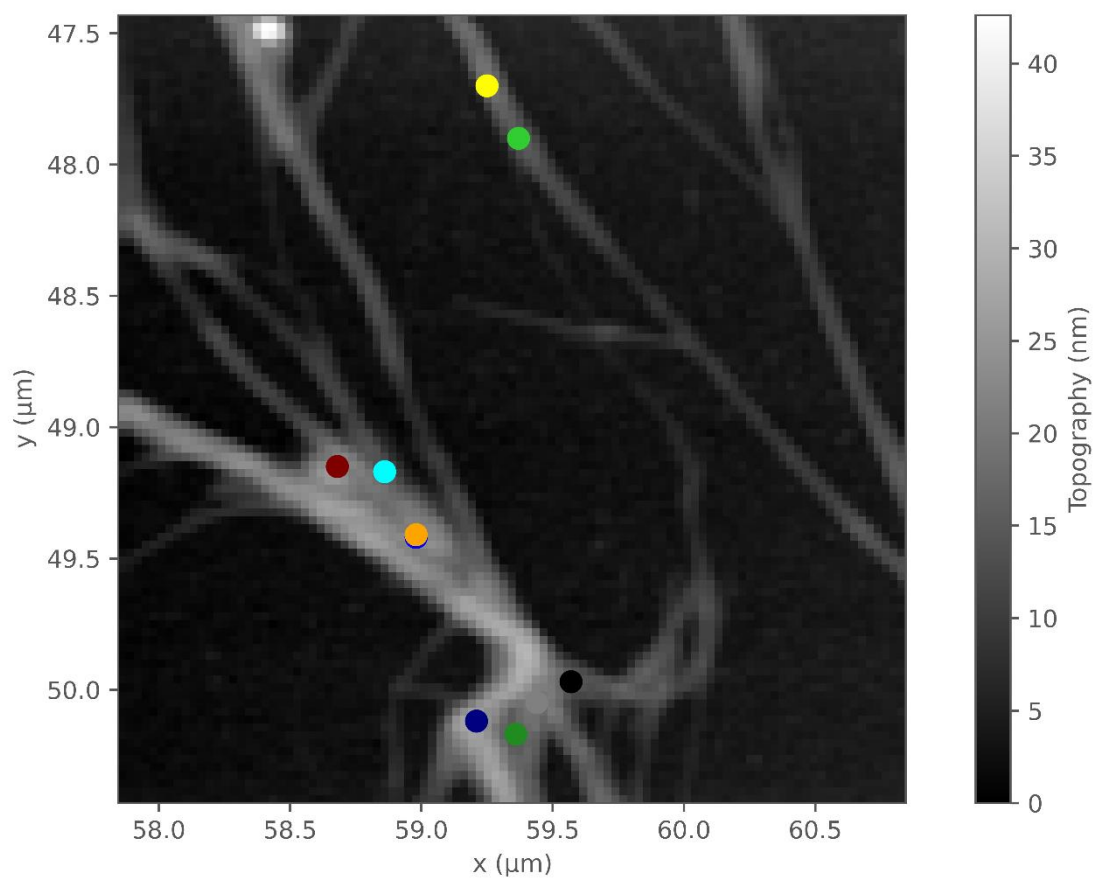

**Figure S11.** AFM image of Dff/Hff co-assembled gel (25 mM each). Colored points indicate the position of infrared spectra acquisition.



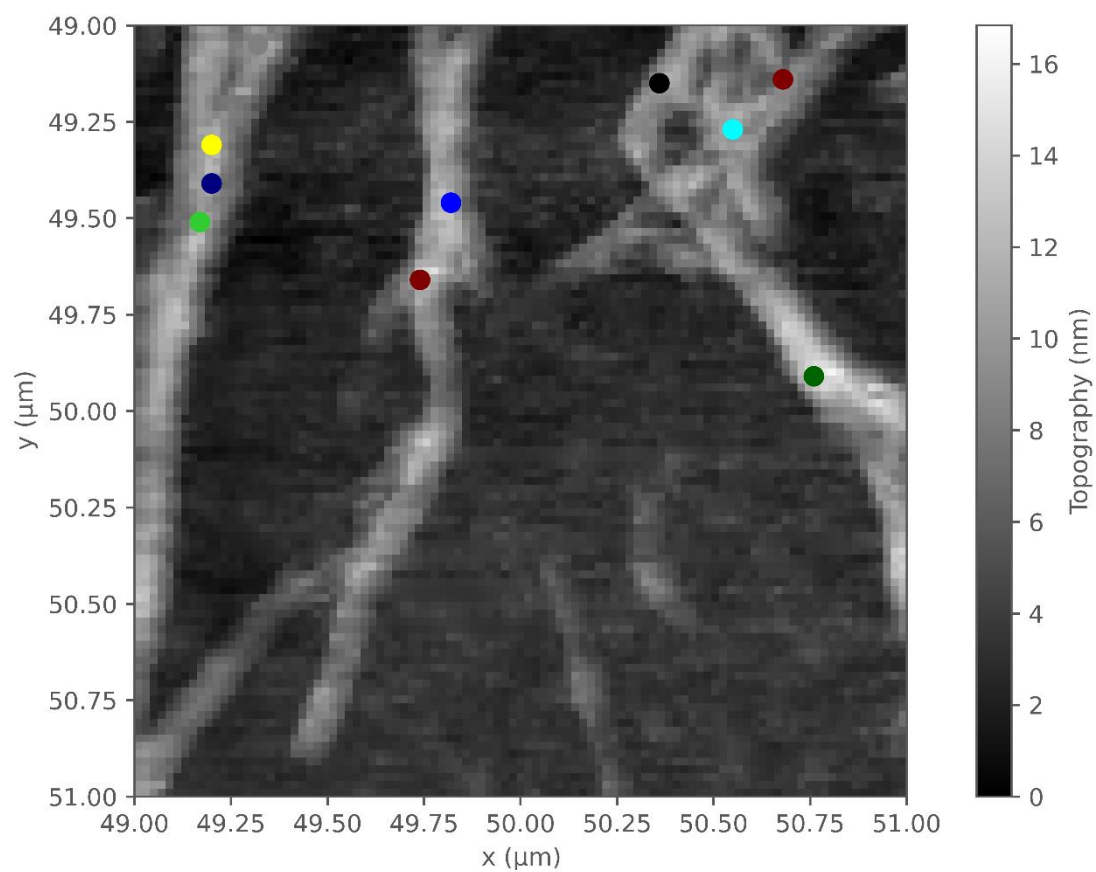

**Figure S12.** AFM image of Dff/hFF co-assembled gel (25 mM each). Colored points indicate the position of infrared spectra acquisition.

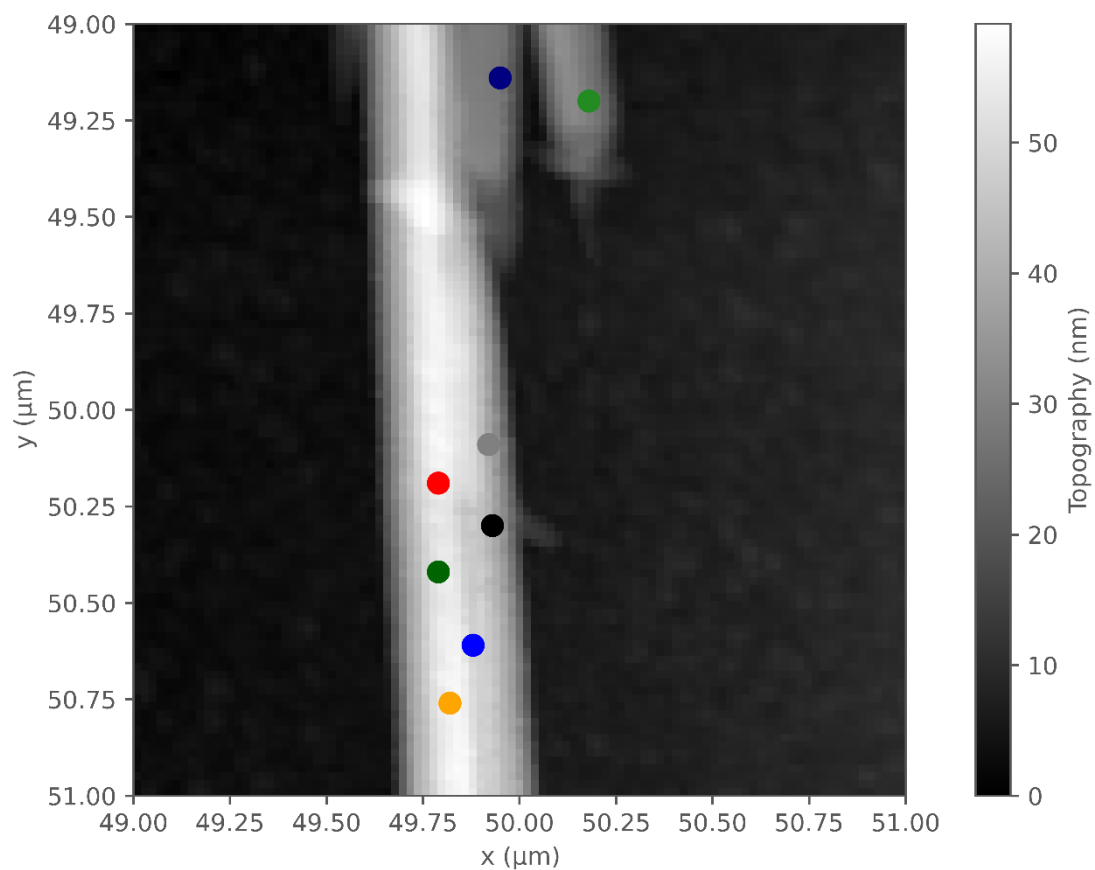

**Figure S13.** AFM image of hFF/Hff co-assembled gel (12.5 mM each). Colored points indicate the position of infrared spectra acquisition.

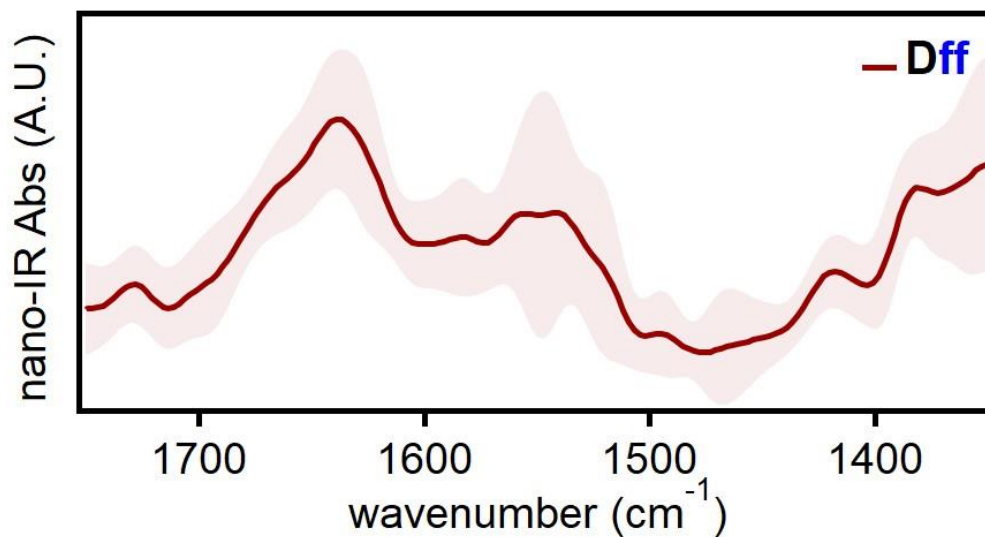

**Figure S14.** Nano-IR data average profile for Dff sample.

## S7. $^1\text{H}$ -NMR spectra of multicomponent samples

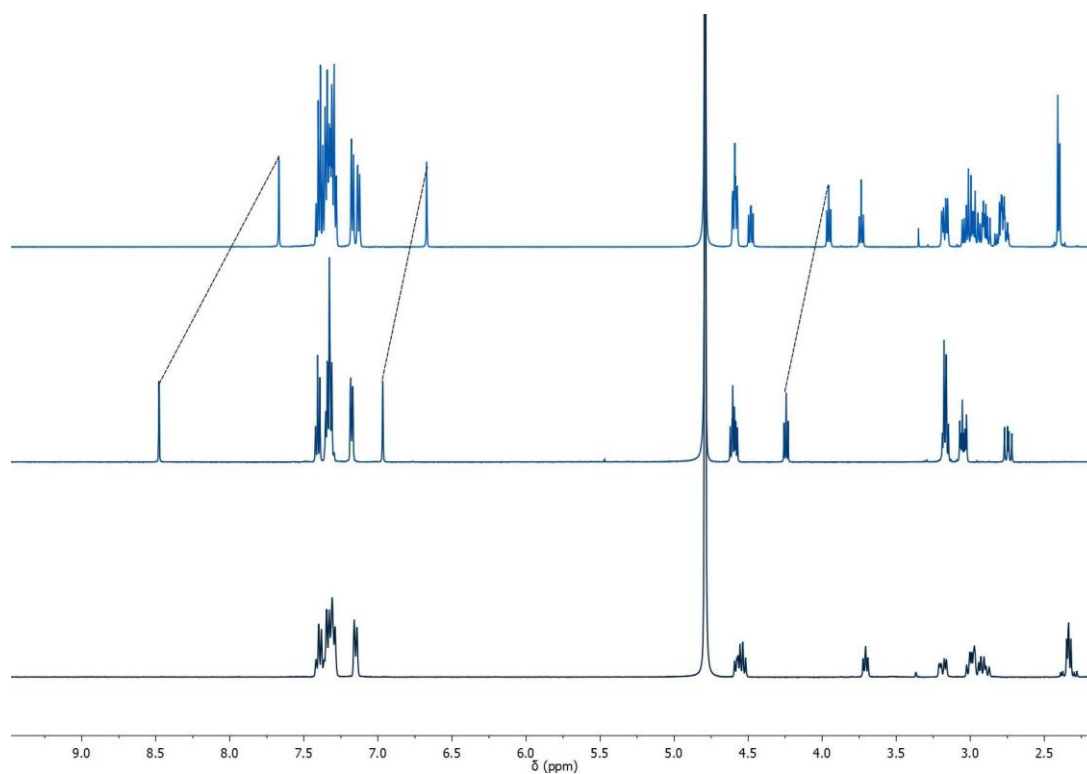

**Figure S15.** Stacked  $^1\text{H}$ -NMR spectra of Hff+ Dff (top), Hff (middle), and Dff (bottom) in  $\text{D}_2\text{O}$  at pH 7. The most significant shifts are marked with dotted lines (His imidazole CHs and  $\text{C}_\alpha\text{-H}$ ).

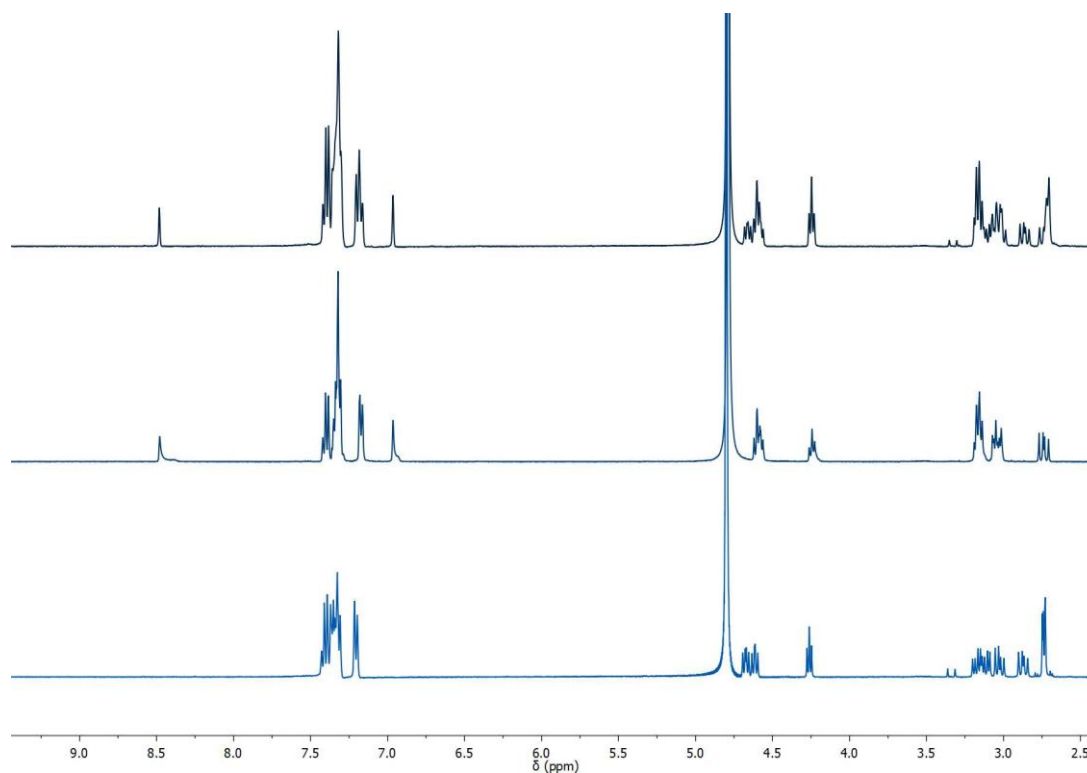

**Figure S16.** Stacked  $^1\text{H}$ -NMR spectra of Hff+ Dff (top), Hff (middle), and Dff (bottom) in  $\text{D}_2\text{O}$  at pH 2. No significant shifts are present.

## S8. Catalytic Data

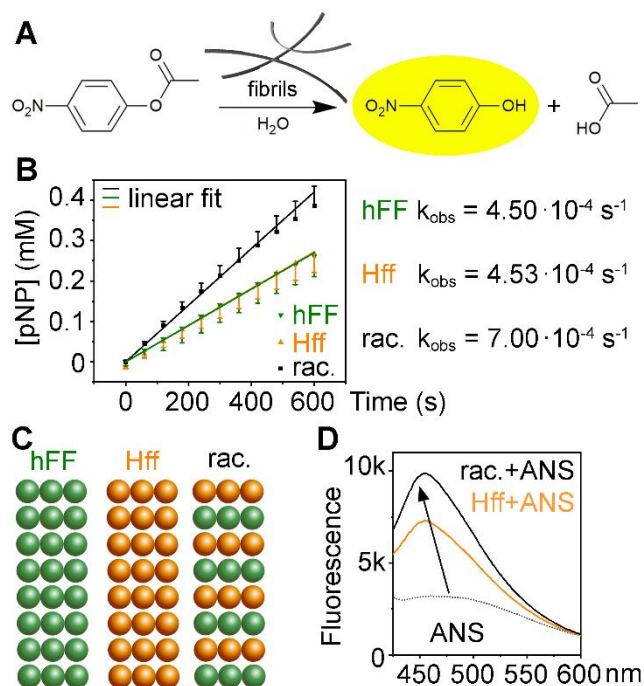

**Figure S17.** **A)** Reaction scheme for p-nitrophenyl acetate (pNPA) hydrolysis catalysed by peptide fibrils to yield yellow p-nitrophenol (pNP). **B)** Initial reaction rate in the presence of fibrils of hFF, Hff, or their racemic mixture (rac.). **C)** Scheme of the proposed assemblies of enantiopure stacks for hFF or Hff, and of alternating enantiomers for the racemic mixture. **D)** Fluorescence emission of ANS in Hff and racemic (rac.) peptide fibers, and in solution. Reproduced from M. C. Mañas-Torres, P. Alletto, S. Adorinni, A. V. Vargiu, L. Álvarez de Cienfuegos, and S. Marchesan, *Org. Biomol. Chem.* **2025**, doi: 10.1039/D4OB01987C.

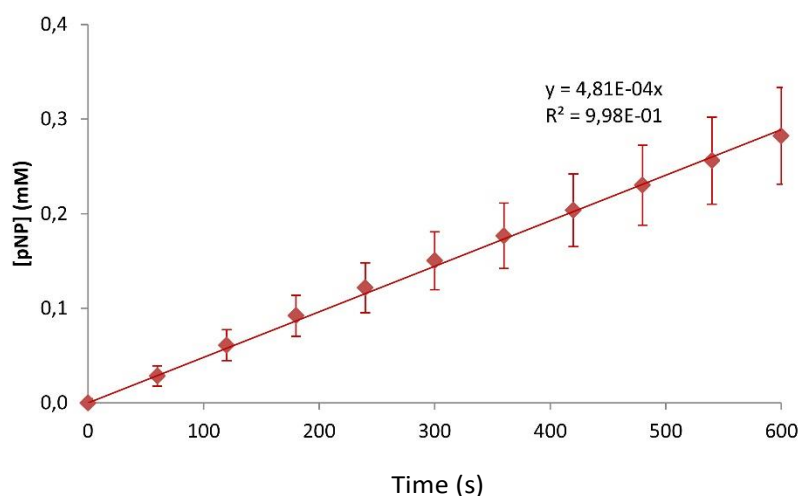

**Figure S18.** Initial reaction rate for samples composed of hFF and Dff, each one at 25 mM, with 1 mM pNPA.

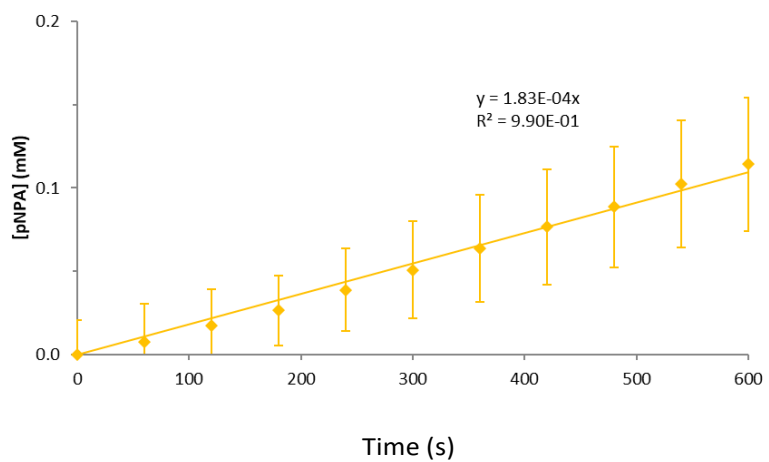

**Figure S19.** Initial reaction rate for samples composed of Hff and Dff, each one at 25 mM, with 1 mM pNPA.
